# Supplementary material for: Sensitive and Specific Detection of Lumpy Skin Disease Virus in Cattle by CRISPR-Cas12a Fluorescent Assay Coupled with Recombinase Polymerase Amplification
Source: MDPI journal article supplement (doi:10.3390/genes13050734), 2022-04-22
Supplement: s1 [file s1]

## Supporting Information

### **Sensitive and specific detection of lumpy skin disease virus in cattle by CRISPR-Cas12a fluorescent assay coupled with recombinase polymerase amplification**

**Chuanwen Jiang<sup>1,2</sup>, Dagang Tao<sup>2</sup>, Yuanchen Geng<sup>1,2</sup>, Hao Yang<sup>1,2</sup>, Bingrong Xu<sup>3</sup>, Yingyu Chen<sup>1,2,4,5</sup>, Changmin Hu<sup>2,4,5</sup>, Huanchun Chen<sup>1,2,4,5</sup>, Shengsong Xie<sup>2,3,4\*</sup>, Aizhen Guo<sup>1,2,4,5\*</sup>**

<sup>1</sup>The State Key Laboratory of Agricultural Microbiology, Huazhong Agricultural University, Wuhan, 430070, China,

<sup>2</sup>College of Veterinary Medicine, Huazhong Agricultural University, Wuhan, 430070, China,

<sup>3</sup>Key Laboratory of Agricultural Animal Genetics, Breeding and Reproduction of Ministry of Education & Key Lab of Swine Genetics and Breeding of Ministry of Agriculture and Rural Affairs, College of Animal Science and Technology, Huazhong Agricultural University, Wuhan, 430070, China,

<sup>4</sup>Hubei Hongshan Laboratory, Wuhan, 430070, China,

<sup>5</sup>Hubei International Scientific and Technological Cooperation Base of Veterinary Epidemiology, International Research Center for Animal Disease, Ministry of Science and Technology of the People's Republic of China, Wuhan, 430070, China,

<sup>6</sup>Key Laboratory of Development of Veterinary Diagnostic Products, Ministry of China Agriculture and Rural Affairs, Wuhan, 430070, China.

\*Correspondence: Aizhen Guo, College of Veterinary Medicine, Huazhong Agricultural University, Wuhan, 430070, China. Email: aizhen@mail.hzau.edu.cn; Tel: 00862787287115; Shengsong Xie, College of Veterinary Medicine, Huazhong Agricultural University, Wuhan, 430070, China. Email: ssxie@mail.hzau.edu.cn.

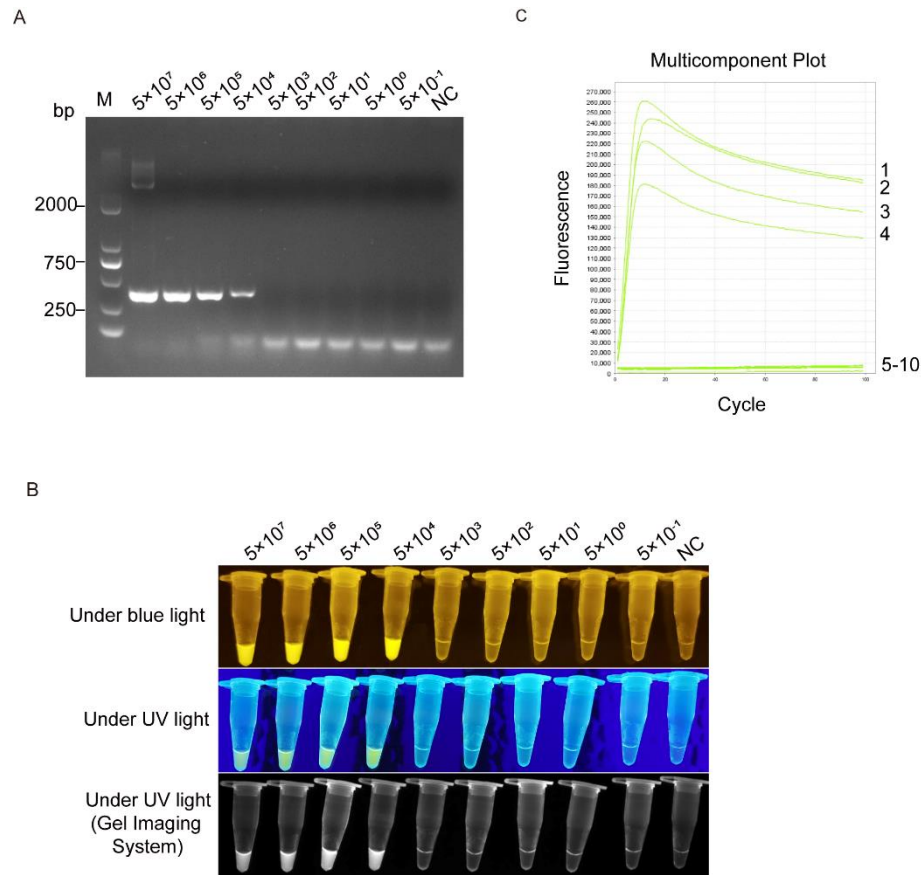

**Figure S1. Comparison of the detection limit of CRISPR-Cas12a with PCR amplification.** **A.** Products of the PCR reaction by using agarose gel electrophoresis analysis. Lane M, DNA ladder; bp, base pairs. **B.** Fluorescent signals from a series of 10-fold dilutions of pUC57-orf068 plasmid DNA (copies/ $\mu$ L) using the CRISPR-Cas12a with PCR amplification. **C.** Sensitivity of the CRISPR-Cas12a with PCR amplification detected by a real-time PCR system. Line 1,  $5 \times 10^7$  copies/ $\mu$ L; line 2,  $5 \times 10^6$  copies/ $\mu$ L; line 3,  $5 \times 10^5$  copies/ $\mu$ L; line 4,  $5 \times 10^4$  copies/ $\mu$ L; line 5,  $5 \times 10^3$  copies/ $\mu$ L; line 6,  $5 \times 10^2$  copies/ $\mu$ L; line 7,  $5 \times 10^1$  copies/ $\mu$ L; line 8,  $5 \times 10^0$  copies/ $\mu$ L; line 9,  $5 \times 10^{-1}$  copies/ $\mu$ L; line 10, negative control. NC, negative control; Under blue or UV lights, the pictures were captured under blue (470 nm) and UV lights by a smartphone camera and gel imaging system using UV light transilluminator.

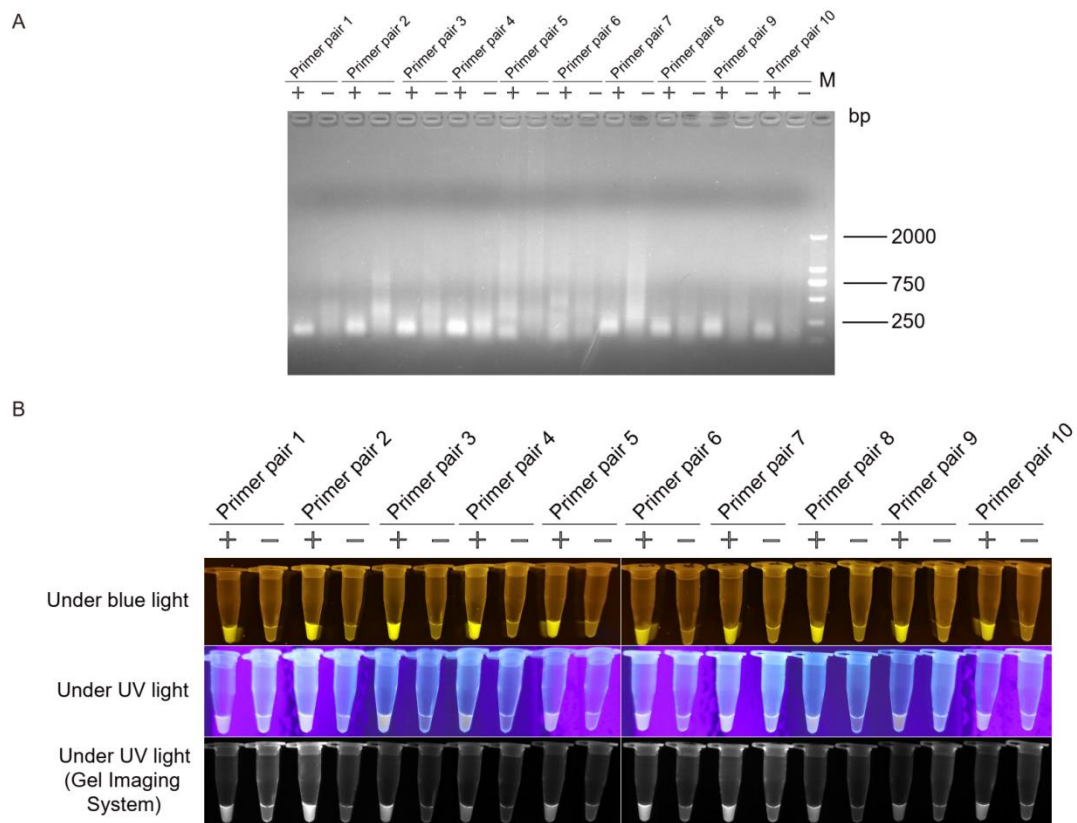

**Figure S2. The efficiencies of ten pairs of specific RPA primers analysis of RPA reaction.** **A.** The detection efficiencies of different primers by using electrophoresis analysis in RPA reaction. **B.** Fluorescence signals of LSDV *orf068* gene using RPA-Cas12a-fluorescence assay. Lane M, DNA ladder; bp, base pairs; Under blue or UV lights, the pictures were captured under blue (470 nm) and UV lights by a smartphone camera and gel imaging system using UV light transilluminator.

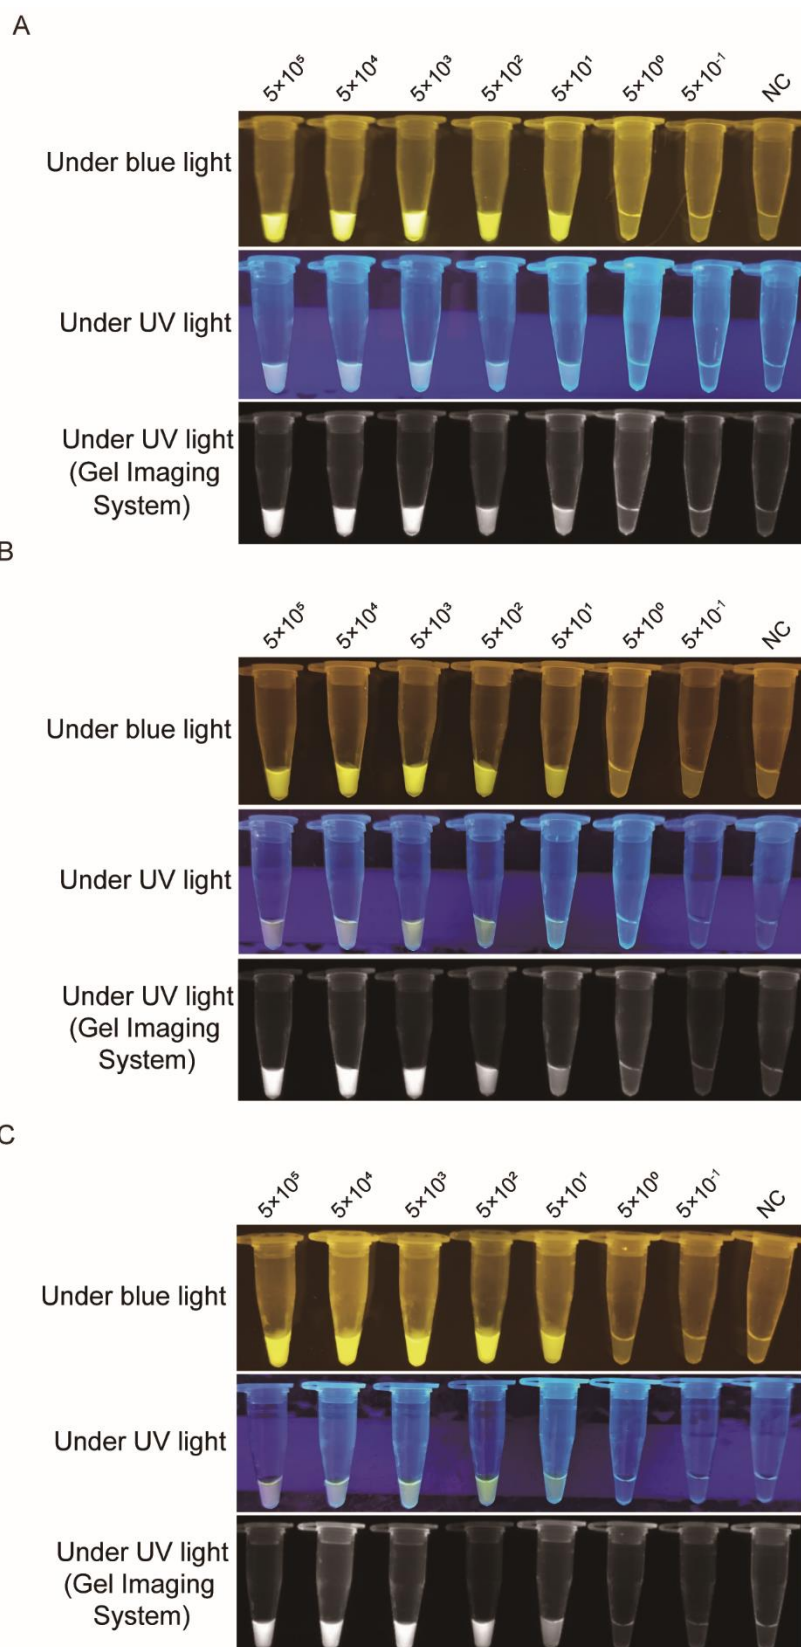

**Figure S3. Comparison of the detection limit of different RPA primers coupled with CRISPR-Cas12a.** **A.** Fluorescent signals from a series of 10-fold dilutions of pUC57-orf068 plasmid DNA (copies/ $\mu$ L) using the CRISPR-Cas12a

with third pair of RPA primer. **B.** Fluorescent signals from a series of 10-fold dilutions of pUC57-orf068 plasmid DNA (copies/ $\mu$ L) using the CRISPR-Cas12a based seventh pair of RPA primer. **C.** Fluorescent signals from a series of 10-fold dilutions of pUC57-orf068 plasmid DNA (copies/ $\mu$ L) using the CRISPR-Cas12a based ninth pair of RPA primer. NC, negative control; Under blue or UV lights, the pictures were captured under blue (470 nm) and UV lights by a smartphone camera and gel imaging system using UV light transilluminator.

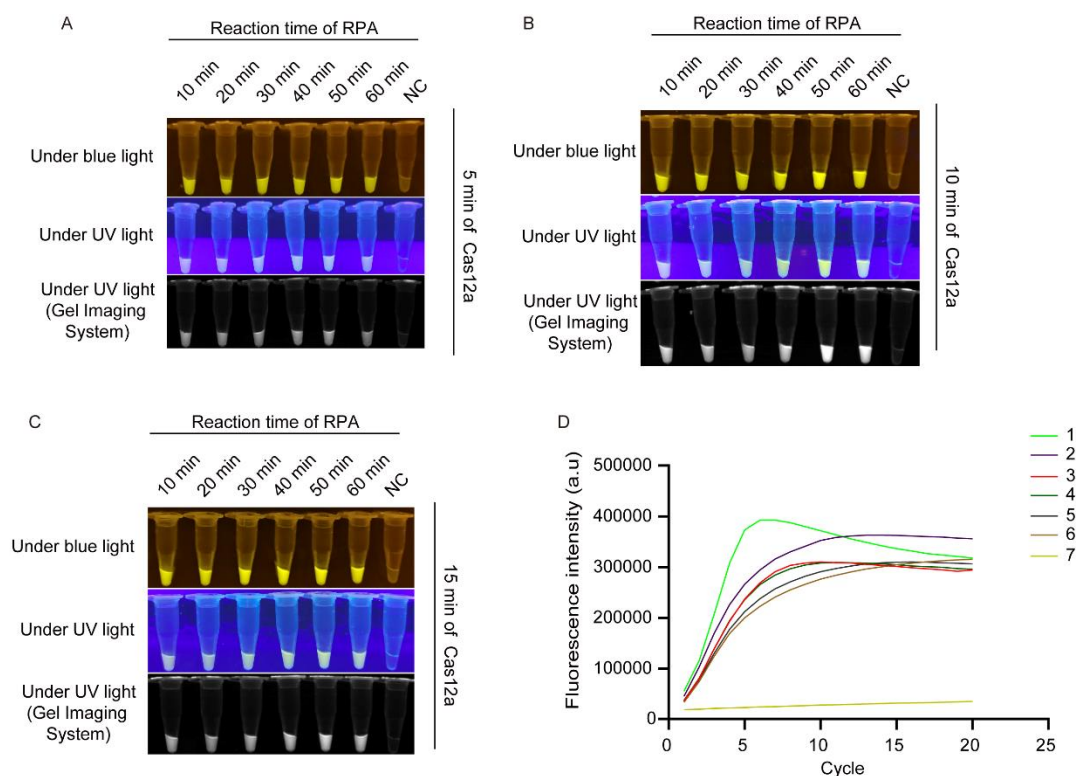

**Figure S4. Optimization of the reaction time for rapid detection of LSDV.** Fluorescence signals of Cas12a assay reacting 5 min (**A**), 10 min (**B**), 15 min (**C**) coupled with different RPA assay reaction time. **D.** Real-time fluorescence signal from CRISPR-Cas12a coupled with different RPA reaction time as monitored in a real-time PCR system. RPA, recombinase polymerase amplification; NC, negative control; Lines 1-6 represent RPA reaction time: 60 min (1), 50 min (2), 40 min (3), 30 min (4), 20 min (5), 10 min (6); Line 7, 60 min (non-template control). Under blue or UV lights, the pictures were captured under blue (470 nm) and UV lights by a smartphone camera and gel imaging system.

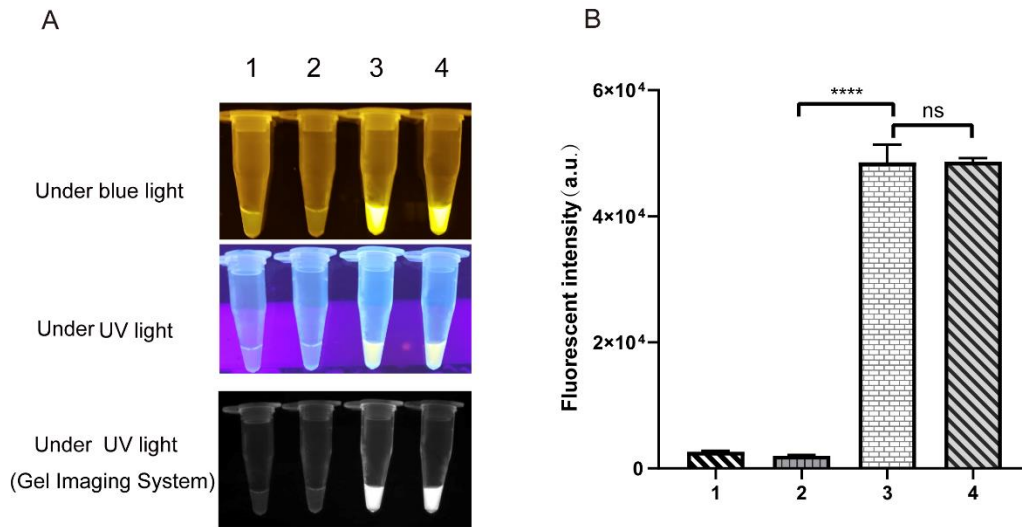

**Figure S5. Evaluation of anti-interference ability with the detection of LSDV-orf068 gene in RPA-Cas12a-fluorescence assay.** **A.** Fluorescent signals from PCR products of orf068 genes in cattle genomic DNA and pUC57-orf068 plasmid templates by RPA-Cas12a-fluorescence assay. **B.** Detection of pUC57-orf068 plasmid with or without cattle genomic DNA by the RPA-Cas12a-fluorescence assay using a multi-function microplate reader. Tube 1, DEPC treated water; Tube 2, cattle genome DNA; Tube 3, mixed pUC57-orf068 and cattle genome DNA; Tube 4, pUC57-orf068. Under blue or UV lights, the pictures were captured under blue (470 nm) and UV lights by a smartphone camera and gel imaging system. \*\*\*\* $p < 0.0001$ ; ns, no significant.

## Supplementary Tables

**Supplementary Table S1. Oligo sequences used in this study.**

| Application                              | Oligonucleotides Name | Sequences (5'-3')                               | Length of production (bp) |
|------------------------------------------|-----------------------|-------------------------------------------------|---------------------------|
| <b>sgRNA (<i>In Vitro</i> Synthesis)</b> | T7-crRNA-F            | TAATACGACTCACTATAGG                             |                           |
|                                          | Orf068-sgR1-R         | TCATTTCTGCAGAATATTTAGG<br>CGATCTACAACAGTAGAAAT  |                           |
|                                          | Orf068-sgR2-R         | TTTTTAACATATTATACATGTG<br>ATATCTACAACAGTAGAAAT  |                           |
|                                          | Orf068-sgR3-R         | TAAAACTTTTGATTTTATAGAT<br>GAATCTACAACAGTAGAAAT  |                           |
|                                          | Orf068-sgR4-R         | AAAACCTTGAAAATTGAATGGT<br>GAAATCTACAACAGTAGAAAT |                           |
|                                          | Orf068-sgR5-R         | TGAAATGCTTCAACCATTTGC<br>GCCATCTACAACAGTAGAAAT  |                           |
|                                          | Orf068-sgR6-R         | TGAAAAAAAGATGTTTTATTT<br>TAAATCTACAACAGTAGAAAT  |                           |
| <b>PCR Primer</b>                        | LSDV-Orf068-F         | GTCCATTCCTGATCAATGGG<br>T                       | 401                       |
|                                          | LSDV-orf068-R         | ACGTTGTGTGGGTCATAGTTT<br>ATT                    |                           |
|                                          | BRSV-N-Outer primer-F | CAAACATAATGACACTTTCAA<br>CAAG                   |                           |
|                                          | BRSV-N-Outer primer-R | CATTTTCATTCCTTAGTACATTG<br>TTG                  |                           |
|                                          | BRSV-N-Inner primer-F | CGTAGTACAGGTGACAACATT<br>G                      | 422                       |
|                                          | BRSV-N-Inner primer-R | ACCAAAGCAGCAACACATAG<br>CAC                     |                           |
|                                          | BVDV-NADL-F           | TCAGCGAAGGCCGAAAAGAG<br>G                       | 310                       |
|                                          | BVDV-NADL-R           | TCCATGTGCCATGTACAGCAG<br>AG                     |                           |
|                                          | BRV-VP6-F             | CCACCAGGTATGAATTGGAC                            | 231                       |

|                        |                  |                                       |     |
|------------------------|------------------|---------------------------------------|-----|
|                        | BRV-VP6-R        | GAGTAATCACTCAGATGGCG                  | 704 |
|                        | BPIV-N-F         | GAGAAAGACCCAGGAAGAC<br>AGA            |     |
|                        | BPIV-N-R         | ACACCCATCGCATAACTCCAG<br>A            |     |
|                        | M.b-Uvrc-F       | TAATTTAGAAGCTTTAAATGA<br>GCGC         | 238 |
|                        | M.b-Uvrc-R       | CATATCTAGGTCAATTAAGGC<br>TTTG         |     |
|                        | M.h-Hyp-F        | CATTTCTTAGGTTTCAGC                    | 306 |
|                        | M.h-Hyp-R        | CAAGTCATCGTAATGCCT                    |     |
|                        | IBRV-TK-F        | ACGGGCTGGGAAAGACAACA<br>ACGG          | 868 |
|                        | IBRV-TK-R        | GCGGACACGTCCAGCACGAA<br>CA            |     |
|                        | E.coli-pohA-F    | GGTAACGTTTCTACCGCAGAG<br>TTG          | 468 |
|                        | E.coli-pohA-R    | CAGGGTTGGTACACTGTCATT<br>ACG          |     |
|                        | BCoV-N-F         | TTGTAATTTTAATATGAGCAGC<br>C           | 909 |
|                        | BCoV-N-R         | TTCTGCCAACTATTATAATAAG                |     |
|                        | Salmonella-stn-F | CTTTGGTCGTAAAATAAGGCG                 | 260 |
|                        | Salmonella-stn-R | TGCCCAAAGCAGAGAGATTC                  |     |
| <b>qPCR<br/>Primer</b> | Orf068-qpcr-F    | GGCGATGTCCATTCCCTG                    | 68  |
|                        | Orf068-qpcr-R    | AGCATTTTCATTCCGTGAGGA                 |     |
| <b>RPA<br/>primer</b>  | RPA-3F           | GGGTAAAAGATTTCTATATTCC<br>TCACGGAAATG | 131 |
|                        | RPA-3R           | ATCCTTTGTGATGCATCTAAGC<br>TTTATAGGATT |     |
|                        | RPA-4F           | ATGGGTAAAAGATTTCTATATT<br>CCTCACGGAAA | 130 |
|                        | RPA-4R           | CTTTGTGATGCATCTAAGCTTT<br>ATAGGATT    |     |
|                        | RPA-7F           | GGTAAAAGATTTCTATATTCCT<br>CACGGAAA    | 139 |
|                        | RPA-7R           | TATAGAATCATCCTTTGTGATG<br>CATCTAAGC   |     |
|                        | RPA-9F           | AATGGGTAAAAGATTTCTATAT<br>TCCTCACG    | 133 |
|                        | RPA-9R           | TCCTTTGTGATGCATCTAAGCT<br>TTATAGGATT  |     |



|                               |              |                                  |  |
|-------------------------------|--------------|----------------------------------|--|
| <b>ssDNA-FQ<br/>reporters</b> | JOE-N12-BHQ1 | /5'-<br>JOE/GTATCCAGTGCG/3'BHQ1/ |  |
|-------------------------------|--------------|----------------------------------|--|

Notes: crRNA, CRISPR RNA; ssDNA-FQ reporters, single-stranded DNA-fluorophore-quencher reporters; sgR, single guide RNA, bp, base pair.

**Supplementary Table S2. Single guide RNAs (sgRNA) used in this study.**

| sgRNAs ID    | Sequences (5'-3')        | PAM  |
|--------------|--------------------------|------|
| Orf068-sgR-1 | CGCCTAAATATTCTGCAGAAATGA | TTTG |
| Orf068-sgR-2 | ATCACATGTATAATATGTTAAAAA | TTTT |
| Orf068-sgR-3 | TCATCTATAAAATCAAAAGTTTTA | TTTT |
| Orf068-sgR-4 | TTCACCATTCAATTTTCAAGTTT  | TTTT |
| Orf068-sgR-5 | GGCGCAAATGGTTGAAGCATTCA  | TTTA |
| Orf068-sgR-6 | TTAAAATAAAACATCTTTTTTTCA | TTTA |

Notes: PAM, protospacer adjacent motif.

Notes: The PCR amplification sequence of LSDV *orf068* gene is as follows:  
>LSDV/Russia/Saratov/2017 ( Genbank: MH646674.1 ) (Partial vector sequences of pUC57-*orf068*, for PCR reaction)

TAATGGTAAGTATATTA<sup>AAA</sup>ACCAGCAGCATCTAGTTTAA<sup>AA</sup>TGGCGATG  
TCCATTCCCTGATCAATGGGTAA<sup>AA</sup>AGATTTCTATATTCCTCACGGAAAT  
GAAATGCTTCAACCA<sup>TTTG</sup>CGCC<sup>TAAA</sup>TATTCTGCAGAAATGAGGTAA  
TAAGTATTTATAGCGGTAATCCTATAAAGCTTAGATGCATCACAAAGGA  
TGATTCTATAAAATATGAAAAAAGATGTTTTATTTTAA<sup>TAAA</sup>ATAATAA  
GGAATAGAATTATTATAAACTTTGATTATTCAAATCAAGAATATGAC<sup>TTT</sup>  
<sup>T</sup>ATCACATGTATAATATGTTAA<sup>AA</sup>ACTGTATATTCTAATAAAGA<sup>TTTT</sup>TCA  
TCTATAAAATCAAAAGTTT<sup>TTT</sup>TTCA<sup>CC</sup>ATTCAATTTTCAAGTTT<sup>TT</sup>TA  
AAAATACCTATATTCAACACAGAAAAA<sup>ATA</sup>AACTATGAACCCACACAA  
CGTAAAATACTTAGCAAAAATATTATGTTTAA<sup>AA</sup>ACCGAAATATTA<sup>AA</sup>A  
AATCCATACGCTATAATAAGTAA

(The target sequence is highlighted in purple, the PAM sequence is highlighted in yellow)
